# Supplementary material
Source: PubMed Central journal article supplement (PMC2217650)
Supplement: plntcell_tpc.107.055517_1.pdf [file plntcell_tpc.107.055517_1.pdf]

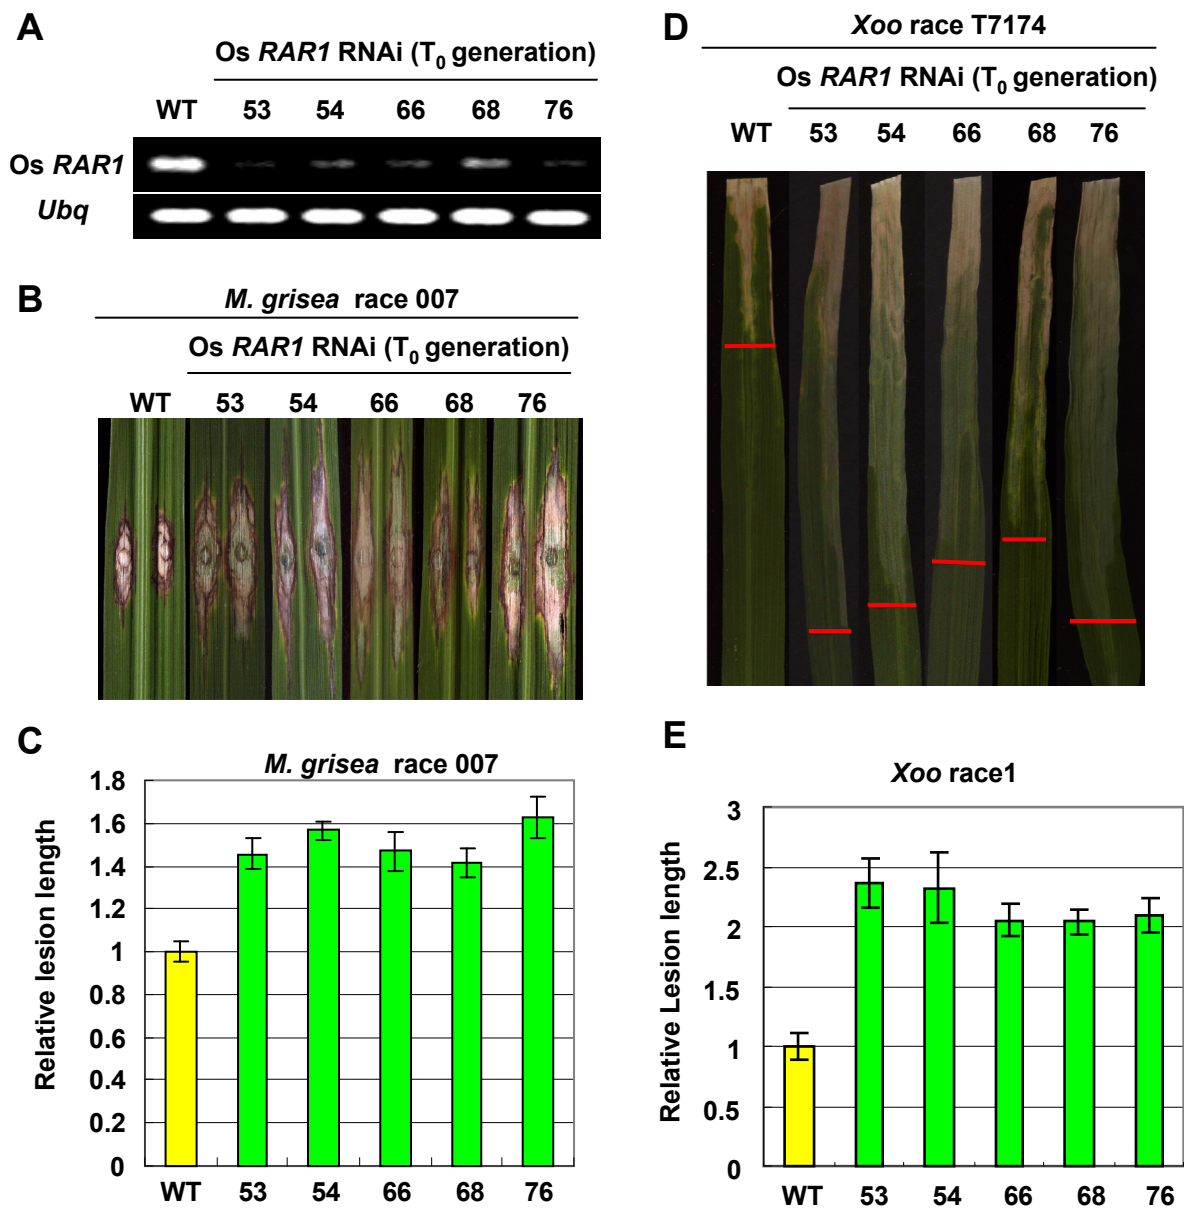

**Supplemental Figure 1. Basal resistance to rice blast and bacterial blight infection in Os *RAR1* RNAi T<sub>0</sub> plants.**

(A) Transcript levels of Os *RAR1* in transgenic plants.

(B) Response of transgenic plants expressing Os *RAR1*-RNAi to infection by the compatible race 007 of the rice blast *Magnaporthe grisea*. Photographs were taken 12 days after infection.

(C) Quantitative analysis of disease lesions induced by infection with a compatible race of rice blast fungus shown in (B).

(D) Response of transgenic plants expressing Os *RAR1*-RNAi to infection with *Xanthomonas oryzae* pv. *oryzae* race1 (T7174). Photographs were taken 12 days after infection.

(E) Quantitative analysis of disease lesions induced by infection with a compatible race of bacterial blight shown in (D). Leaves were inoculated with the *Xanthomonas oryzae* race 1. Bar indicates SEM obtained from 5 to 9 measurements.

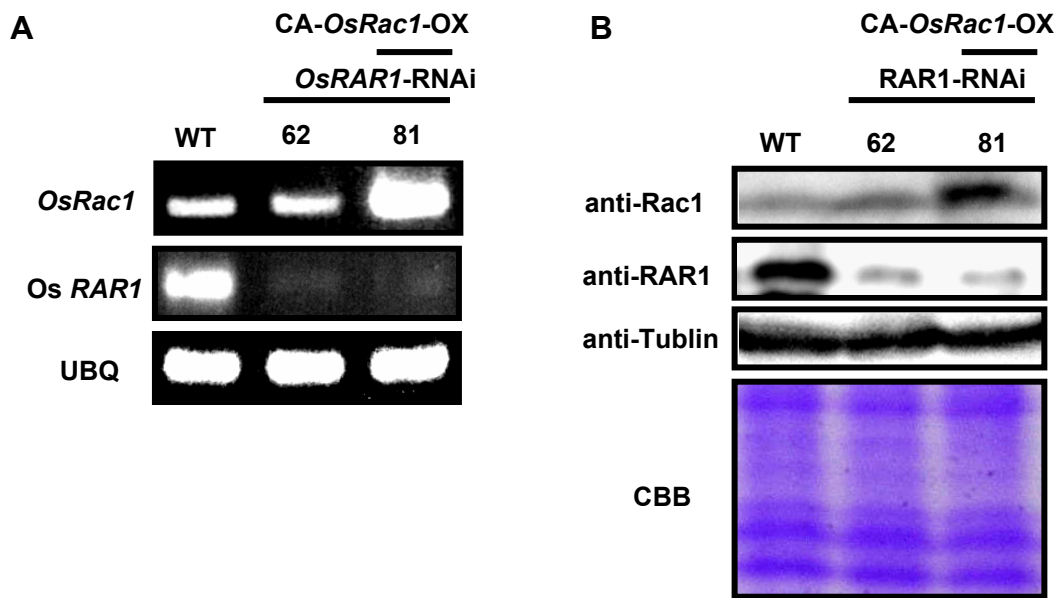

**Supplemental Figure 2. *OsRAR1* transcript levels are consistent with protein levels in *OsRAR1*-RNAi rice cultured cell lines.**

- (A) Transcript levels of *OsRAR1* in *OsRAR1*-RNAi transgenic rice cultured cell lines. WT: wild type, Line 62: Os RAR1-RNAi line. Line81: RAR1-RNAi / CA-OsRac1 double transgenic line.
- (B) Protein levels of *OsRAR1* in *OsRAR1*-RNAi transgenic rice cultured cell lines.
